# Supplementary material for: A dynamic local scale vegetation model for lycophytes (LYCOm)
Source: Copernicus journal article supplement (doi:10.5194/gmd-2021-202), 2021-07-21
Supplement: Supplementary file [file gmd-2021-202-AC1-supplement.pdf]

Dear Dr. Astrid Kerkweg,

Here is a point-by-point response to the comments and concerns.

**Comment 1:** *The main paper must give the model name and version number (or other unique identifier) in the title*

**Response:** In order to meet the standardized protocol of the Journal we plan on modifying the title of the article to "A dynamic local scale vegetation model for lycophytes (LYCOM v1.0)". Thank you for pointing this out.

**Comment 2:** *Code must be published on a persistent public archive with a unique identifier for the exact model version described in the paper or uploaded to the supplement, unless this is impossible for reasons beyond the control of authors. All papers must include a section, at the end of the paper, entitled "Code availability". Here, either instructions for obtaining the code, or the reasons why the code is not available should be clearly stated. It is preferred for the code to be uploaded as a supplement or to be made available at a data repository with an associated DOI (digital object identifier) for the exact model version described in the paper. Alternatively, for established models, there may be an existing means of accessing the code through a particular system. In this case, there must exist a means of permanently accessing the precise model version described in the paper. In some cases, authors may prefer to put models on their own website, or to act as a point of contact for obtaining the code. Given the impermanence of websites and email addresses, this is not encouraged, and authors should consider improving the availability with a more permanent arrangement. Making code available through personal websites or via email contact to the authors is not sufficient. After the paper is accepted the model archive should be updated to include a link to the GMD paper.*

**Response:** We would like to include a section on "code availability" specifying the DOI link to the data repository of the model code. As of now, the code has been made available to the reviewers in Zenodo repository and has been specified in the *Model code and software* section during the submission process.

Code availability: The Model code (LYCOM v1.0) for the discussed article is archived at [10.5281/zenodo.4960947](https://doi.org/10.5281/zenodo.4960947)

We look forward to hearing from you in due time regarding our submission and to respond to any further questions and comments you may have.

Yours Sincerely,

Suman Halder
